# Supplementary material for: Novel Bat Trypanosoma Lineages, Range Expansion of Known Species, and the Habitat- Specialist T. cruzi IV: Evidence from a Conserved Tropical Forest in Southeastern Mexico
Source: Research Square preprint supplement (doi:10.21203/rs.3.rs-7782276/v1), 2025-10-28

Gel 1. Agarose gel showing PCR products obtained using the Miniexon protocol (Fernandes et al., 2001) for the detection of Trypanosoma cruzi in mammal samples. The expected band (~100 bp) is visible in positive samples. The table indicates the sample code and the corresponding mammal species.

| Sample code | Species |
| --- | --- |
| KK100 | Pteronotus parnelli |
| KK302 | Artibeus jamaicensis |
| KK331 | Heteromys gaumeri |
| KK339 | Heteromys gaumeri |
| KK032 | Artibeus jamaicensis |
| KK038 | Artibeus jamaicensis |
| KK042 | Desmosus rotundus |
| KK118 | Glossophaga mutica |
| KK188 | Heteromys gaumeri |
| KK189 | Heteromys gaumeri |
| KK191 | Heteromys gaumeri |


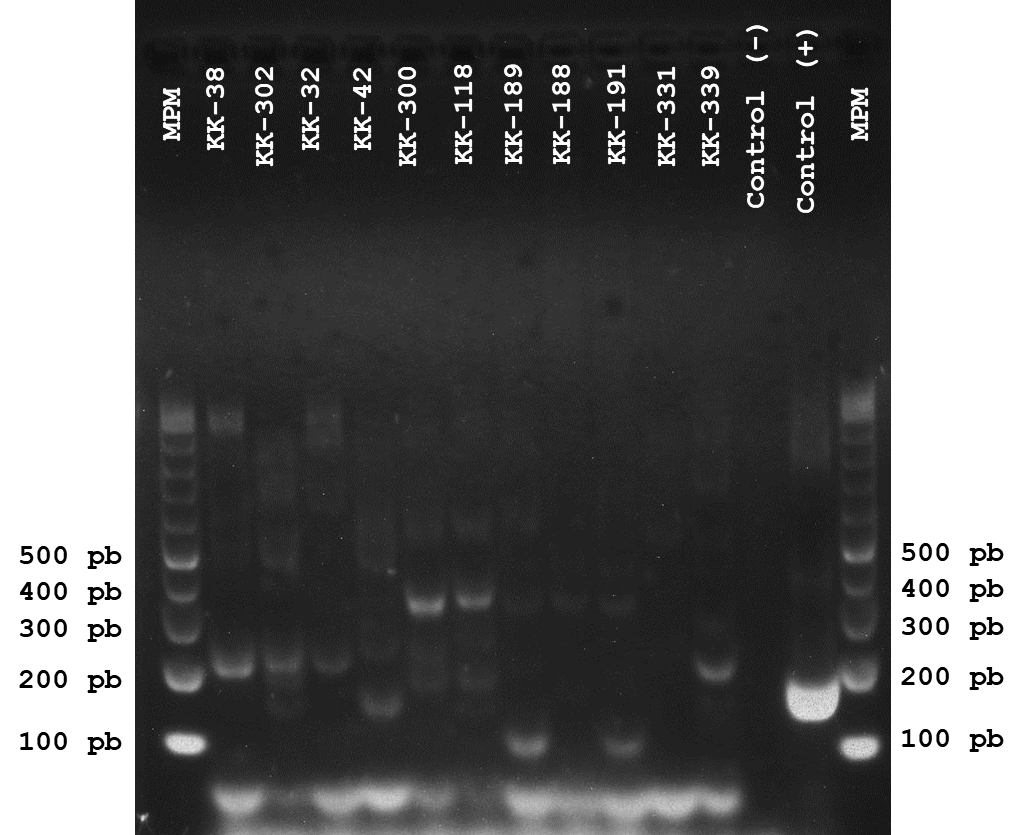


Gel 2. Agarose gel showing PCR products obtained using the Miniexon protocol (Fernandes et al., 2001) for the detection of Trypanosoma cruzi in mammal samples. The expected band (~100 bp) is visible in positive samples. The table indicates the sample code and the corresponding mammal species.

| KK333 | Ototylomys phyllotis |
| --- | --- |
| KK340 | Heteromys gaumeri |
| KK022 | Heteromys gaumeri |
| KK043 | Heteromys gaumeri |
| KK052 | Ototylomys phyllotis |
| KK063 | Heteromys gaumeri |
| KK064 | Heteromys gaumeri |
| KK165 | Heteromys gaumeri |
| KK185 | Heteromys gaumeri |
| KK186 | Heteromys gaumeri |
| KK187 | Heteromys gaumeri |
| KK276 | Pteronotus parnelli |
| KK224 | Desmosus rotundus |


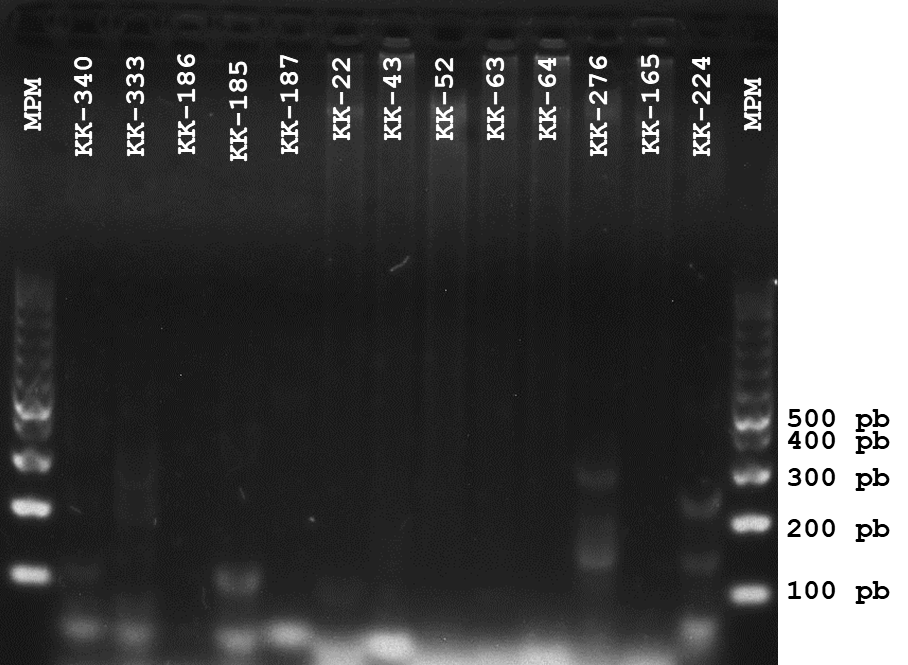


Gel 3. Agarose gel showing PCR products obtained using the Miniexon protocol (Fernandes et al., 2001) for the detection of Trypanosoma cruzi in mammal samples. The expected band (~100 bp) is visible in positive samples. The table indicates the sample code and the corresponding mammal species.

| KK159 | Heteromys gaumeri |
| --- | --- |
| KK160 | Heteromys gaumeri |
| KK162 | Heteromys gaumeri |
| KK205 | Artibeus jamaicensis |
| KK214 | Molossus rufus |
| KK216 | Desmosus rotundus |
| KK222 | Artibeus jamaicensis |
| KK228 | Desmosus rotundus |
| KK252 | Heteromys gaumeri |
| KK253 | Heteromys gaumeri |
| KK275 | Mormoops megalophylla |
| KK282 | Heteromys gaumeri |
| KK283 | Ototylomys phyllotis |


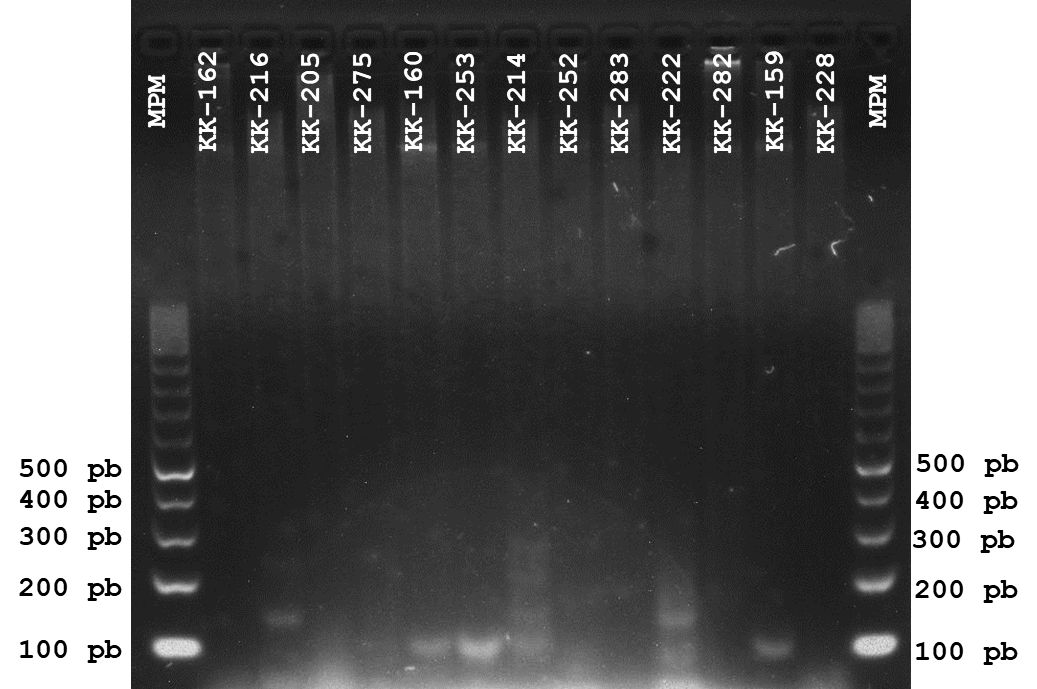


Gel 4. Agarose gel showing PCR products obtained using the Miniexon protocol (Fernandes et al., 2001) for the detection of Trypanosoma cruzi in mammal samples. The expected band (~100 bp) is visible in positive samples. The table indicates the sample code and the corresponding mammal species.

| KK348 | Artibeus jamaicensis |
| --- | --- |
| KK350 | Artibeus jamaicensis |
| KK363 | Artibeus jamaicensis |
| KK380 | Heteromys gaumeri |
| KK410 | Pteronotus davyi |
| KK195 | Desmosus rotundus |
| KK223 | Desmosus rotundus |
| KK235 | Artibeus jamaicensis |
| KK245 | Heteromys gaumeri |
| KK247 | Heteromys gaumeri |
| KK264 | Heteromys gaumeri |
| KK277 | Mormoops megalophylla |
| KK284 | Heteromys gaumeri |


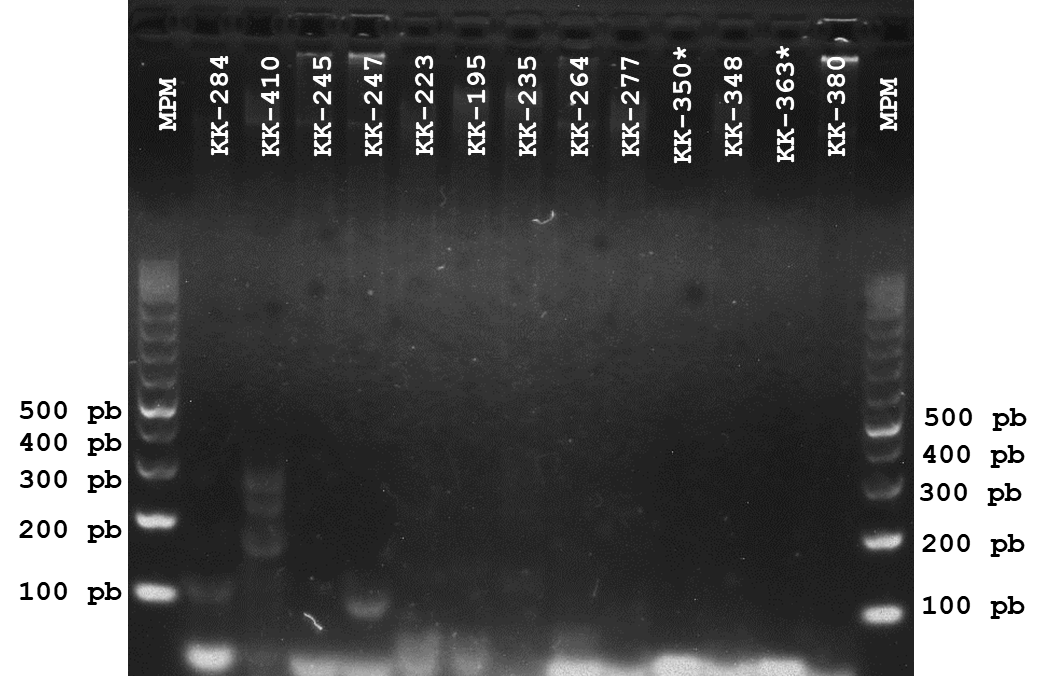


Gel 5. Agarose gel showing PCR products obtained using the Miniexon protocol (Fernandes et al., 2001) for the detection of Trypanosoma cruzi in mammal samples. The expected band (~100 bp) is visible in positive samples. The table indicates the sample code and the corresponding mammal species.

| KK365 | Artibeus jamaicensis |
| --- | --- |
| KK366 | Pteronotus parnelli |
| KK367 | Artibeus jamaicensis |
| KK368 | Artibeus jamaicensis |
| KK371 | Dermanura phaeotis |
| KK377 | Heteromys gaumeri |
| KK379 | Heteromys gaumeri |
| KK391 | Oryzomys couesi |
| KK396 | Pteronotus parnelli |
| KK400 | Pteronotus davyi |
| KK405 | Pteronotus davyi |


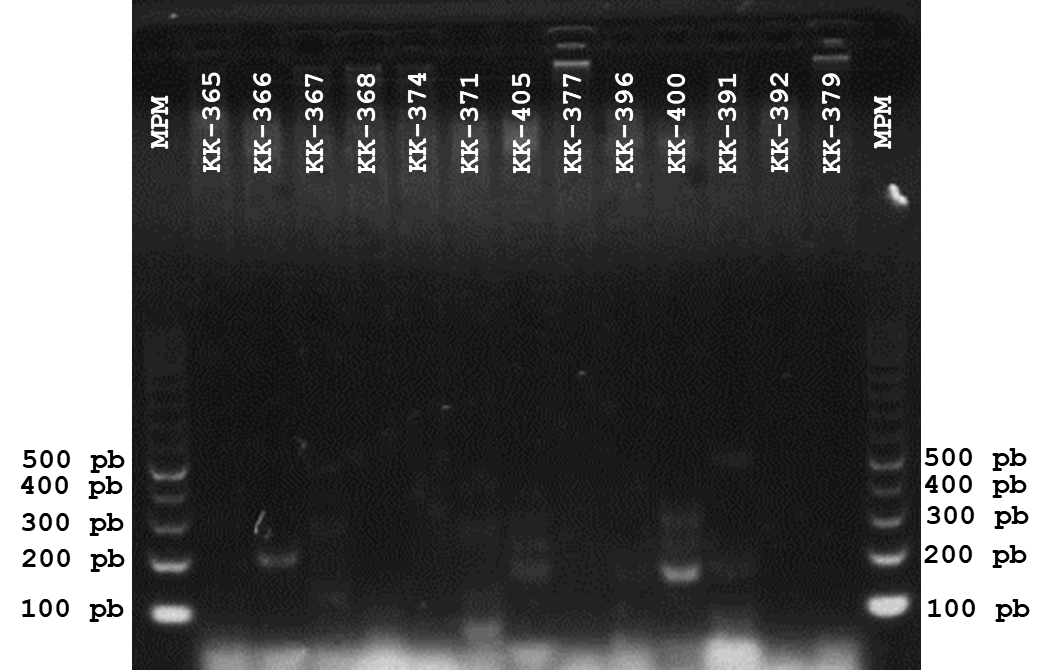


Gel 6. Agarose gel showing PCR products obtained using the Miniexon protocol (Fernandes et al., 2001) for the detection of Trypanosoma cruzi in mammal samples. The expected band (~100 bp) is visible in positive samples. The table indicates the sample code and the corresponding mammal species.

| KK320 | Pteronotus parnelli |
| --- | --- |
| KK337 | Pteronotus parnelli |
| KK360 | Artibeus jamaicensis |
| KK369 | Artibeus jamaicensis |
| KK383 | Heteromys gaumeri |
| KK384 | Heteromys gaumeri |
| KK399 | Pteronotus davyi |
| KK412 | Pteronotus parnelli |
| KK414 | Pteronotus davyi |
| KK417 | Pteronotus parnelli |
| KK425 | Pteronotus parnelli |
| KK029 | Artibeus jamaicensis |
| KK048 | Artibeus jamaicensis |


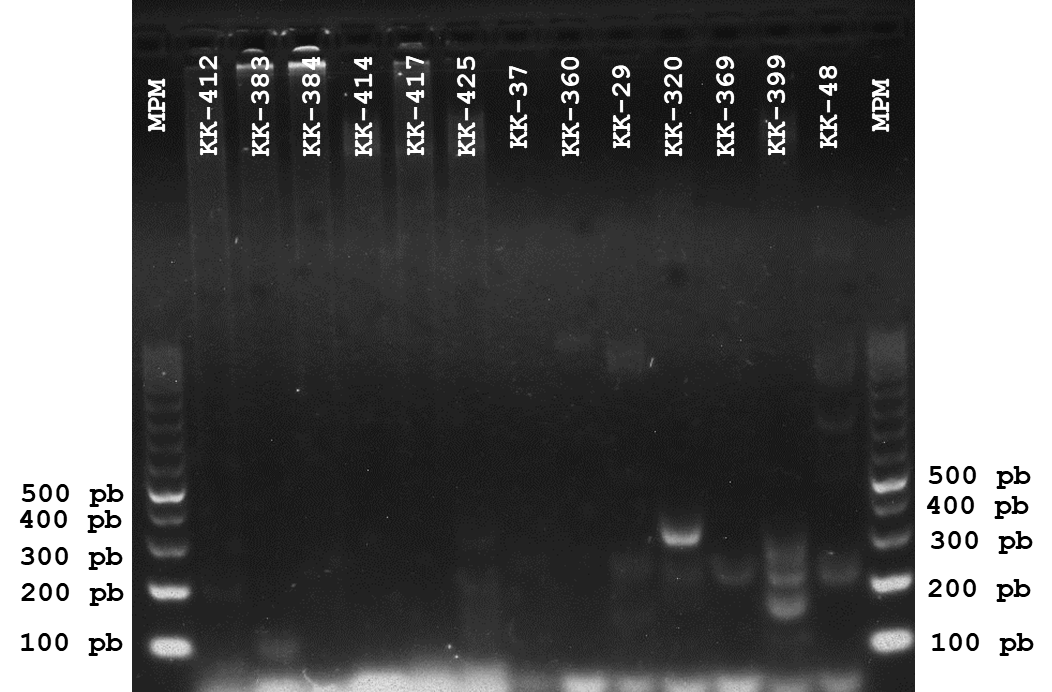


Gel 7. Agarose gel showing PCR products obtained using the Miniexon protocol (Fernandes et al., 2001) for the detection of Trypanosoma cruzi in mammal samples. The expected band (~100 bp) is visible in positive samples. The table indicates the sample code and the corresponding mammal species.

| KK301 | Pteronotus parnelli |
| --- | --- |
| KK306 | Pteronotus parnelli |
| KK028 | Artibeus jamaicensis |
| KK055 | Dermanura tolteca |


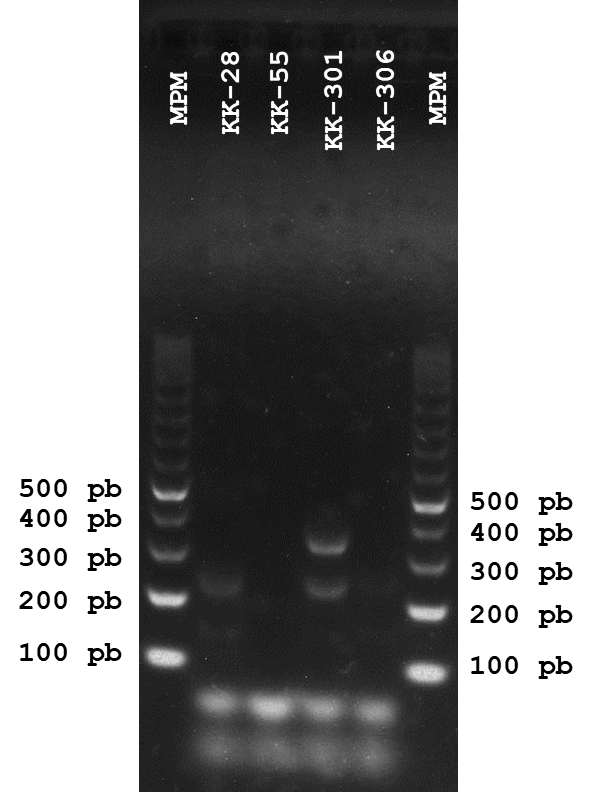


Gel 8. Agarose gel showing PCR products obtained using the Miniexon protocol (Fernandes et al., 2001) for the detection of Trypanosoma cruzi in mammal samples. The expected band (~100 bp) is visible in positive samples. The table indicates the sample code and the corresponding mammal species.

| KK335 | Heteromys gaumeri |
| --- | --- |
| KK108 | Mormoops megalophylla |
| KK122 | Pteronotus parnelli |
| KK148 | Heteromys gaumeri |
| KK154 | Heteromys gaumeri |
| KK197 | Pteronotus davyi |
| KK204 | Artibeus jamaicensis |
| KK227 | Artibeus jamaicensis |
| KK239 | Desmosus rotundus |
| KK267 | Ototylomys phyllotis |


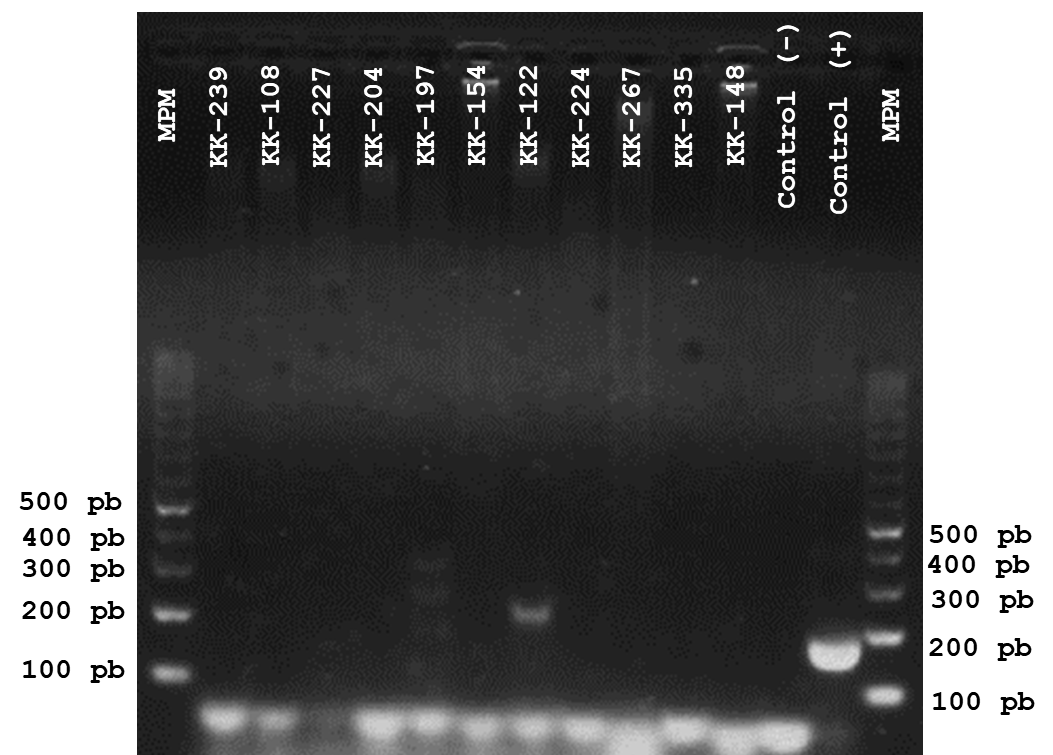


Gel 9. Agarose gel showing PCR products obtained using the Miniexon protocol (Fernandes et al., 2001) for the detection of Trypanosoma cruzi in mammal samples. The expected band (~100 bp) is visible in positive samples. The table indicates the sample code and the corresponding mammal species.

| KK304 | Artibeus jamaicensis |
| --- | --- |
| KK316 | Pteronotus parnelli |
| KK324 | Artibeus jamaicensis |
| KK330 | Heteromys gaumeri |
| KK019 | Dermanura phaeotis |
| KK020 | Dermanura phaeotis |
| KK112 | Pteronotus parnelli |
| KK120 | Artibeus lituratus |
| KK125 | Artibeus jamaicensis |
| KK137 | Sturnira parvidens |
| KK143 | Pteronotus parnelli |
| KK144 | Pteronotus parnelli |
| KK150 | Heteromys gaumeri |


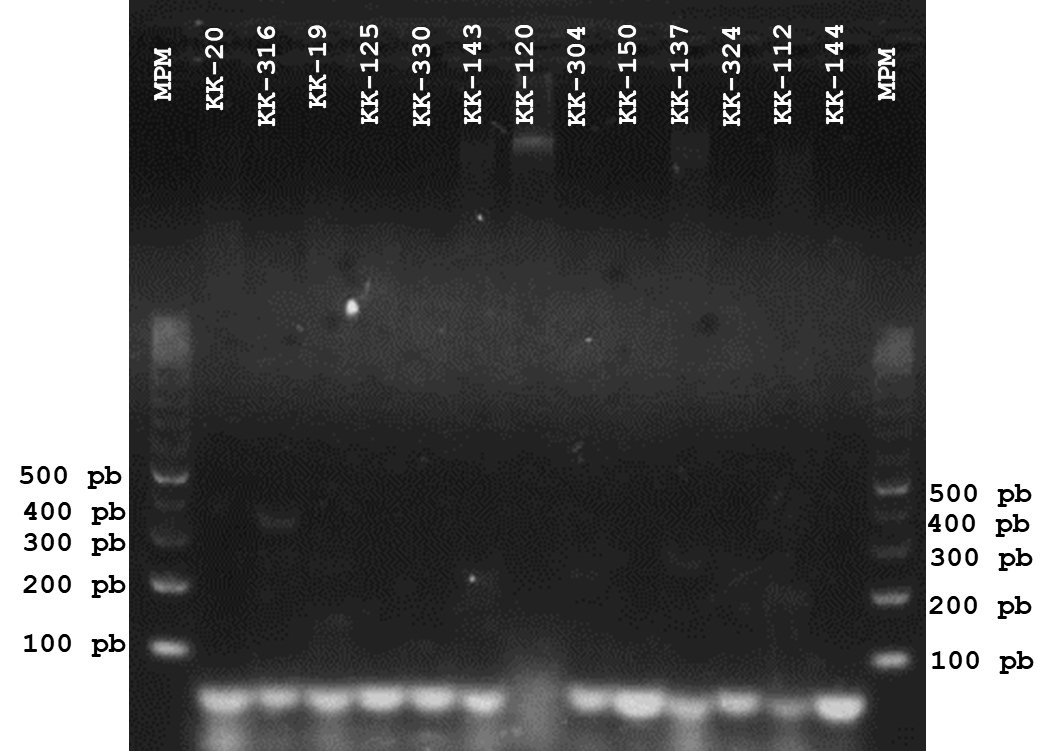


Gel 10. Agarose gel showing PCR products obtained using the Miniexon protocol (Fernandes et al., 2001) for the detection of Trypanosoma cruzi in mammal samples. The expected band (~100 bp) is visible in positive samples. The table indicates the sample code and the corresponding mammal species.

| KK307 | Artibeus jamaicensis |
| --- | --- |
| KK317 | Artibeus jamaicensis |
| KK336 | Pteronotus parnelli |
| KK111 | Pteronotus parnelli |
| KK113 | Pteronotus parnelli |
| KK141 | Artibeus jamaicensis |
| KK157 | Heteromys gaumeri |
| KK161 | Heteromys gaumeri |
| KK163 | Heteromys gaumeri |
| KK164 | Heteromys gaumeri |


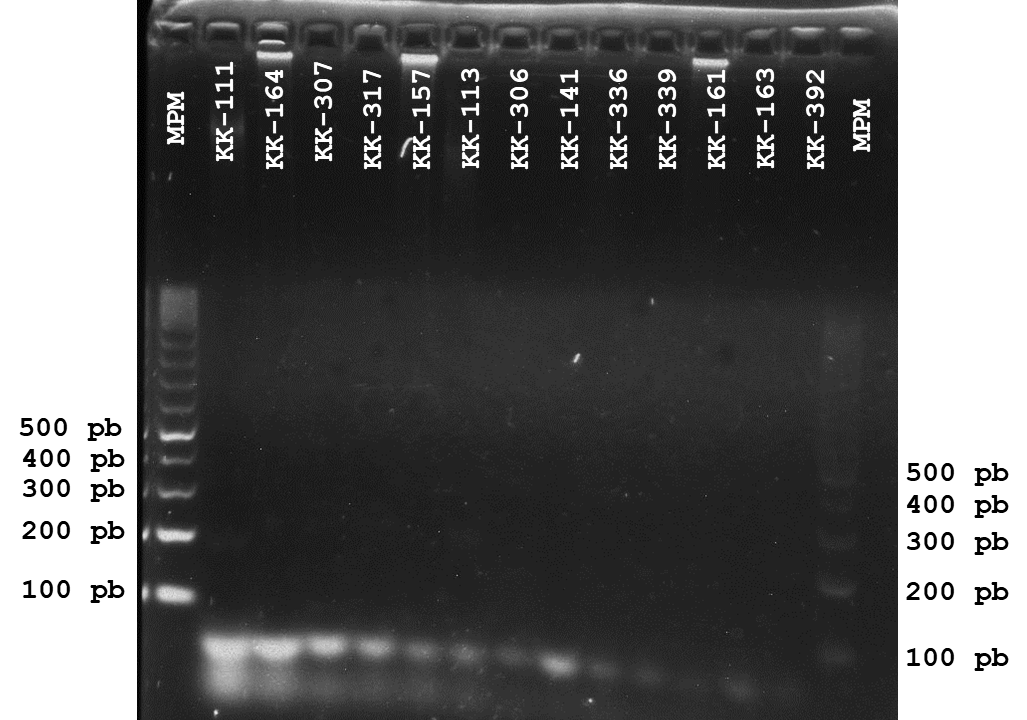


Gel 11. Agarose gel showing PCR products obtained using the Miniexon protocol (Fernandes et al., 2001) for the detection of Trypanosoma cruzi in mammal samples. The expected band (~100 bp) is visible in positive samples. The table indicates the sample code and the corresponding mammal species.

| KK310 | Pteronotus parnelli |
| --- | --- |
| KK311 | Artibeus jamaicensis |
| KK313 | Artibeus jamaicensis |
| KK318 | Pteronotus parnelli |
| KK323 | Pteronotus parnelli |
| KK338 | Heteromys gaumeri |
| KK117 | Pteronotus parnelli |
| KK233 | Artibeus jamaicensis |


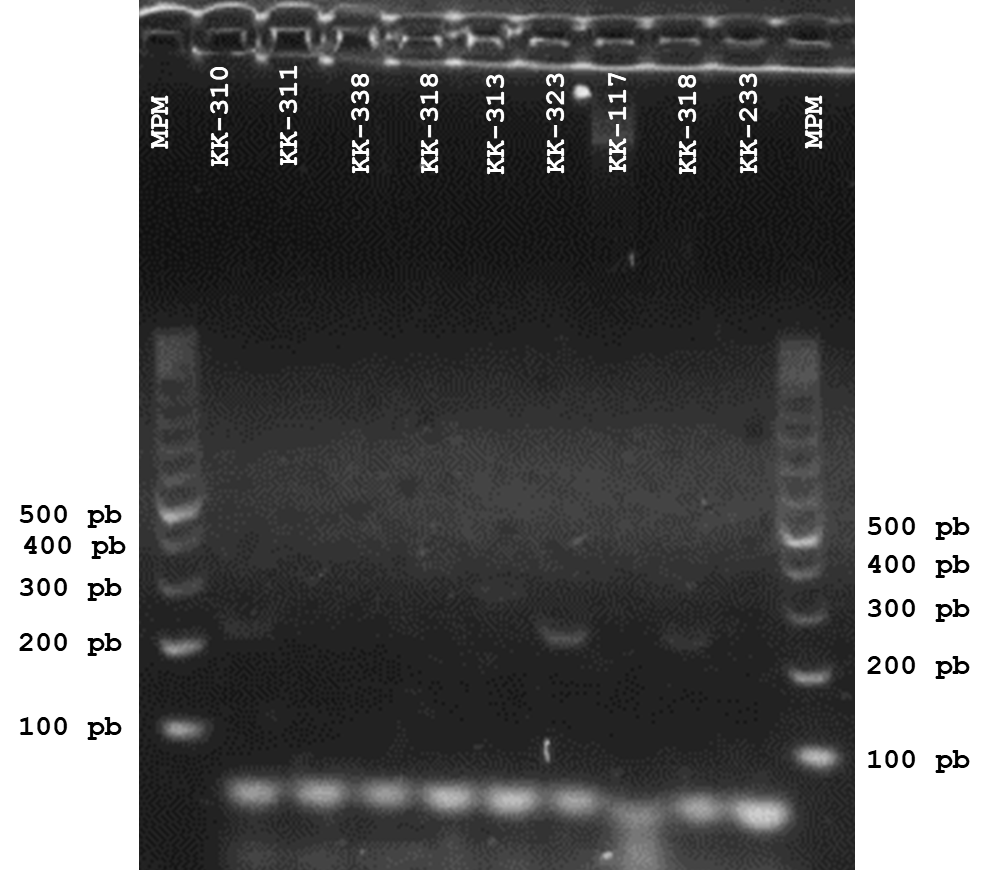


Gel 12. Agarose gel showing PCR products obtained using the Miniexon protocol (Fernandes et al., 2001) for the detection of Trypanosoma cruzi in Triatoma dimidiata. The expected band (~100 bp) is visible in positive samples. The first sample corresponds to a mammal. The remaining samples correspond to intestinal content or feces from the vector Triatoma dimidiata.

| KK319 | Pteronotus parnelli |
| --- | --- |


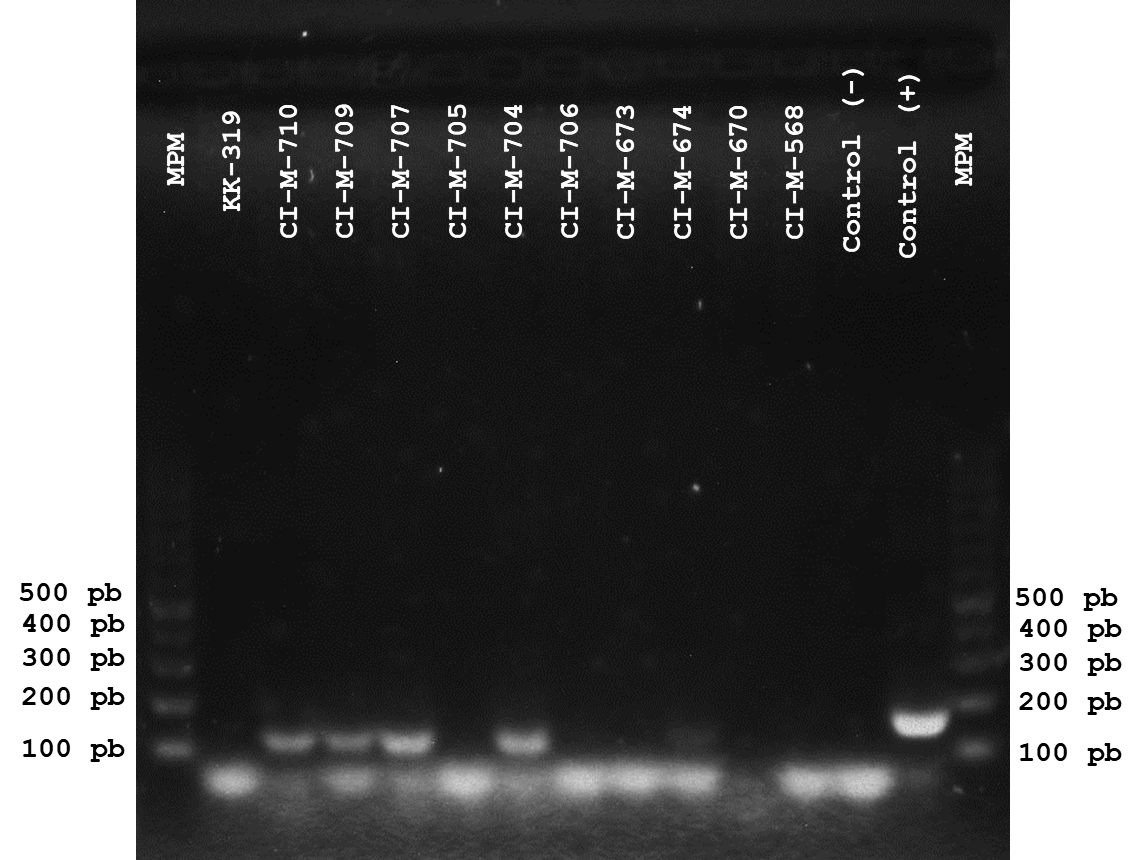


Gel 13. Agarose gel showing PCR products obtained using the Miniexon protocol (Fernandes et al., 2001) for the detection of Trypanosoma cruzi in Triatoma dimidiata. The expected band (~100 bp) is visible in positive samples. The samples correspond to intestinal content or feces


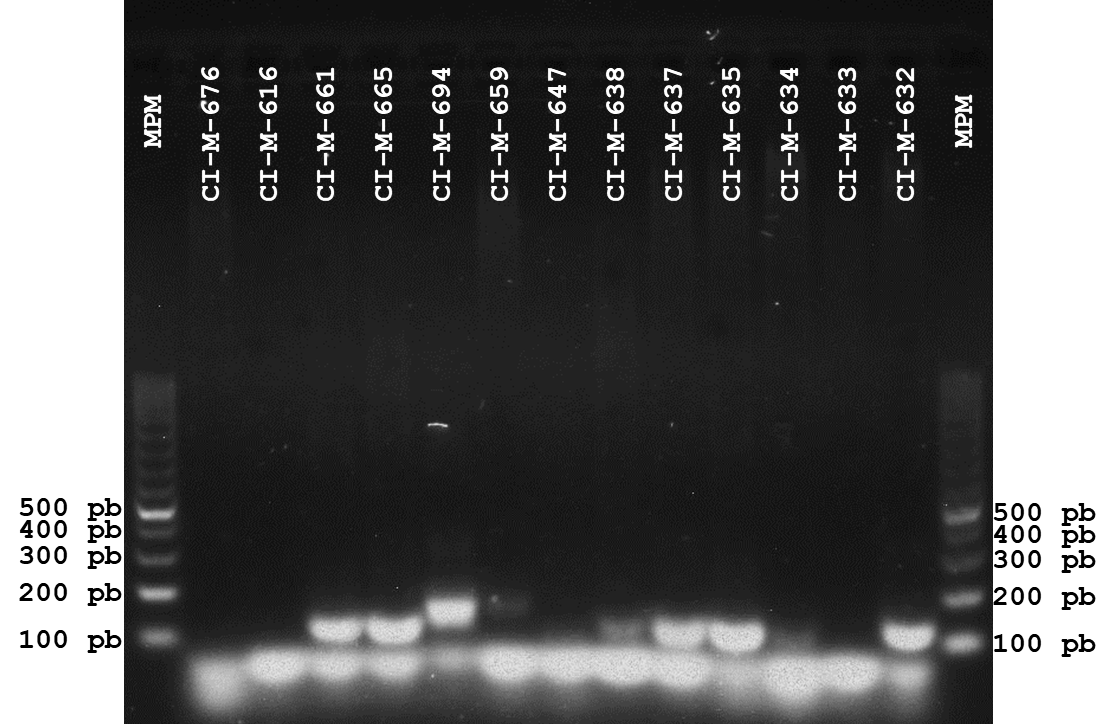


Gel 14. Agarose gel showing PCR products obtained using the Miniexon protocol (Fernandes et al., 2001) for the detection of Trypanosoma cruzi in Triatoma dimidiata. The expected band (~100 bp) is visible in positive samples. The samples correspond to intestinal content or feces.
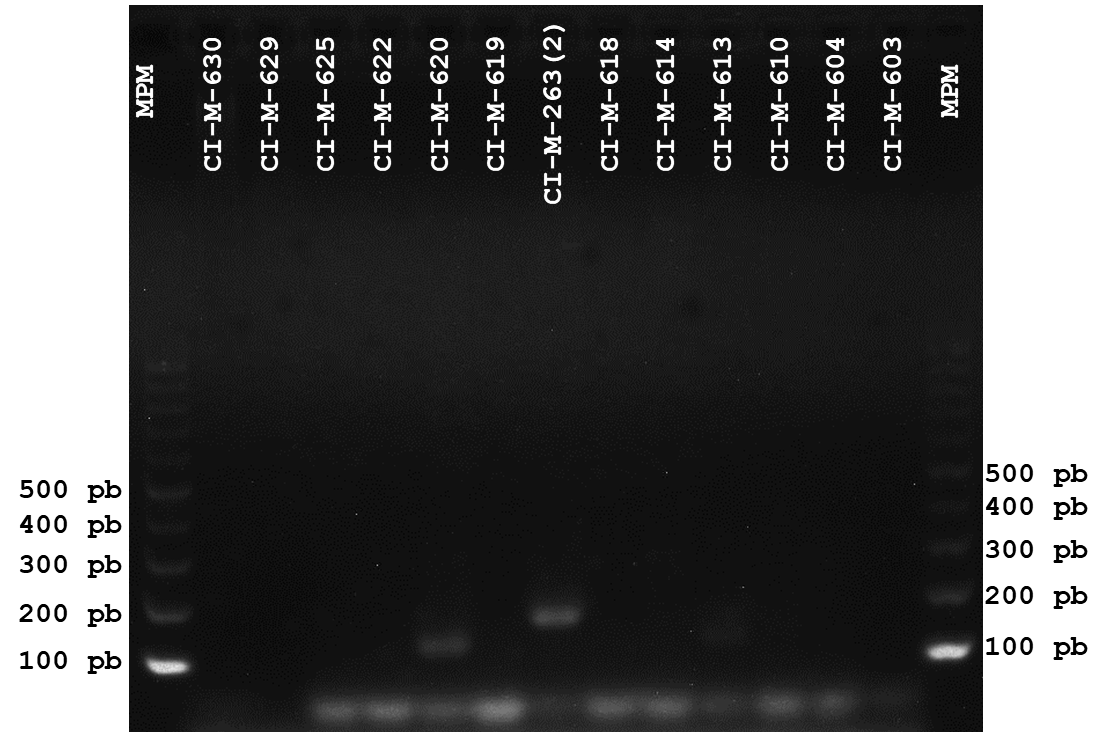


Gel 15. Agarose gel showing PCR products obtained using the Miniexon protocol (Fernandes et al., 2001) for the detection of Trypanosoma cruzi in Triatoma dimidiata. The expected band (~100 bp) is visible in positive samples. The samples correspond to intestinal content or feces.


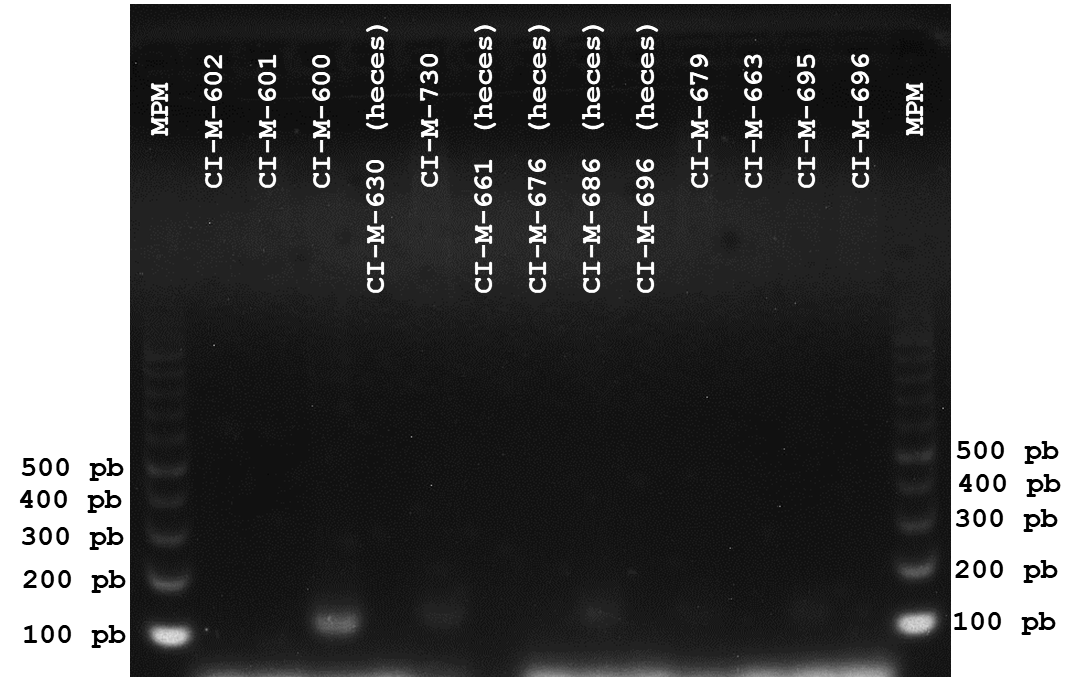


Gel 16. Agarose gel showing PCR products obtained using the Miniexon protocol (Fernandes et al., 2001) for the detection of Trypanosoma cruzi in Triatoma dimidiata. The expected band (~100 bp) is visible in positive samples. The samples correspond to intestinal content or feces.


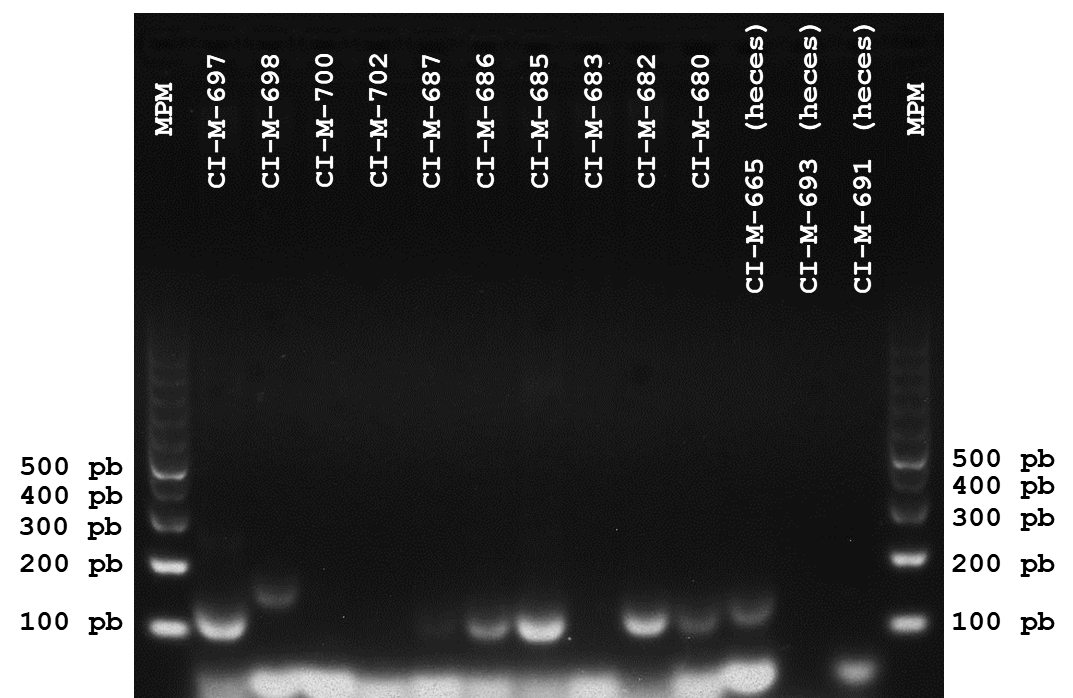


Gel 17. Agarose gel showing PCR products obtained using the Miniexon protocol (Fernandes et al., 2001) for the detection of Trypanosoma cruzi in Triatoma dimidiata. The expected band (~100 bp) is visible in positive samples. The samples correspond to intestinal content or feces.
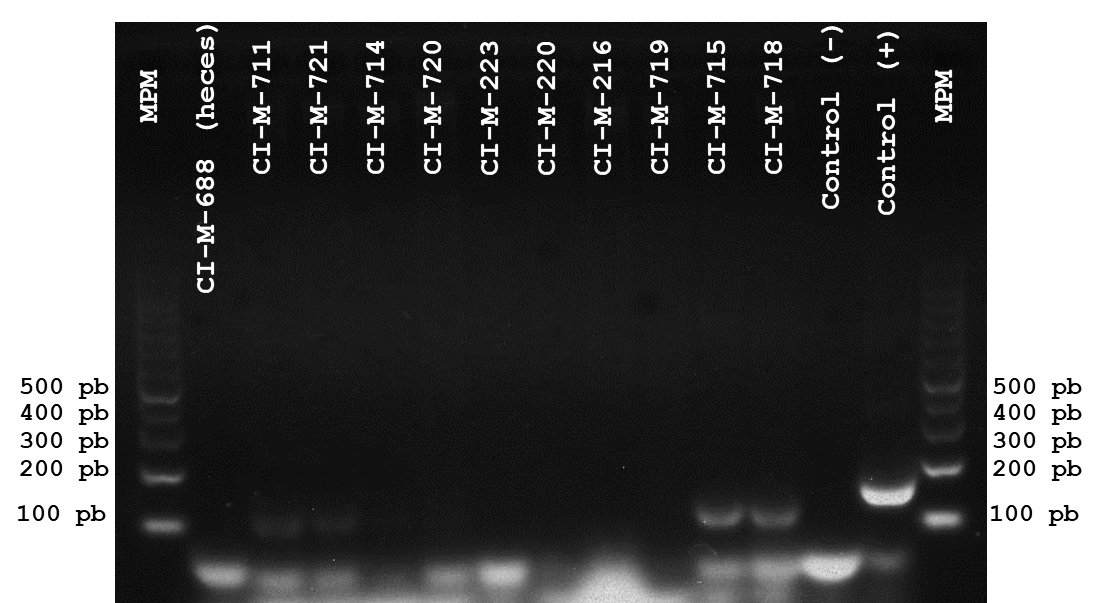


Gel 18. Agarose gel showing PCR products obtained using the Miniexon protocol (Fernandes et al., 2001) for the detection of Trypanosoma cruzi in Triatoma dimidiata. The expected band (~100 bp) is visible in positive samples. The samples correspond to intestinal content or feces.
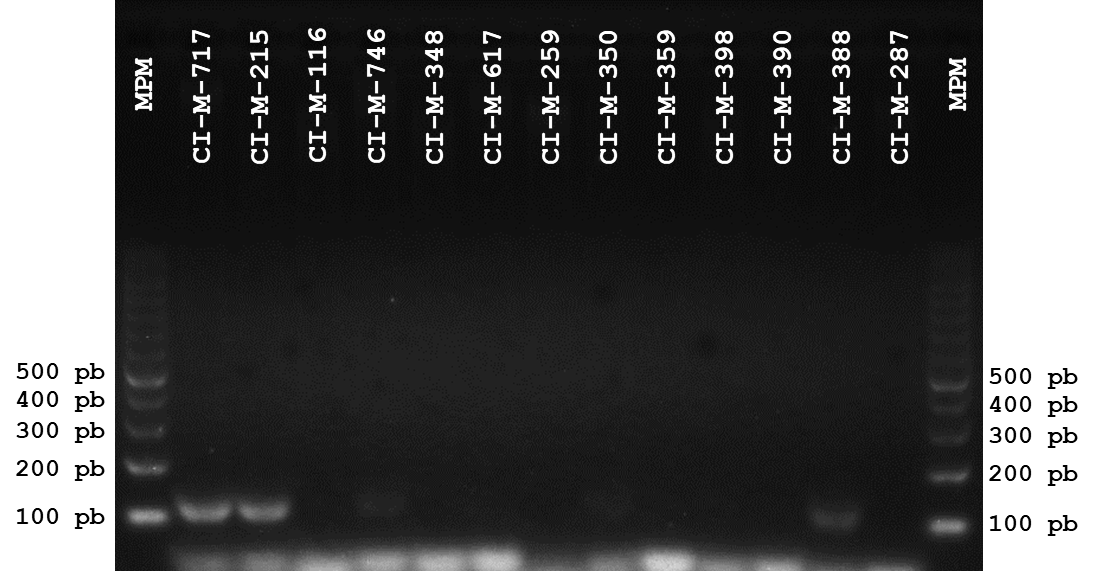


Gel 19. Agarose gel showing PCR products obtained using the Miniexon protocol (Fernandes et al., 2001) for the detection of Trypanosoma cruzi in Triatoma dimidiata. The expected band (~100 bp) is visible in positive samples. The samples correspond to intestinal content or feces.
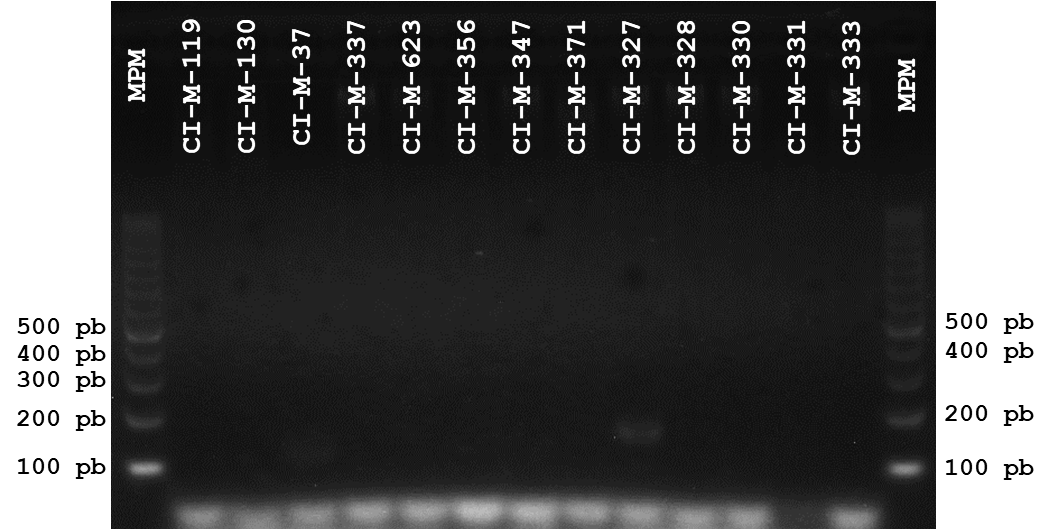


Gel 20. Agarose gel showing PCR products obtained using the Miniexon protocol (Fernandes et al., 2001) for the detection of Trypanosoma cruzi in Triatoma dimidiata. The expected band (~100 bp) is visible in positive samples. The samples correspond to intestinal content or feces.
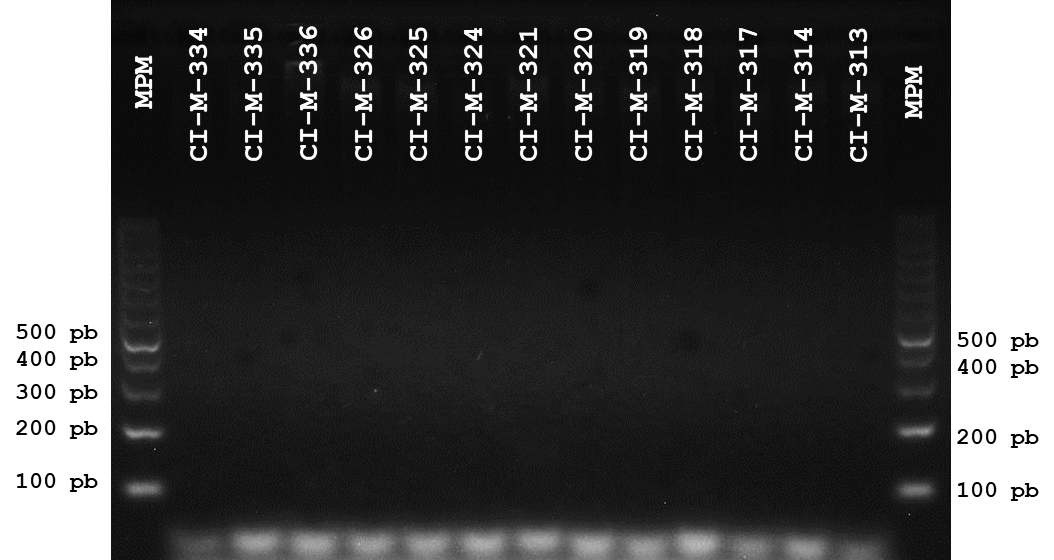


Gel 21. Agarose gel showing PCR products obtained using the Miniexon protocol (Fernandes et al., 2001) for the detection of Trypanosoma cruzi in Triatoma dimidiata. The expected band (~100 bp) is visible in positive samples. The samples correspond to intestinal content or feces.


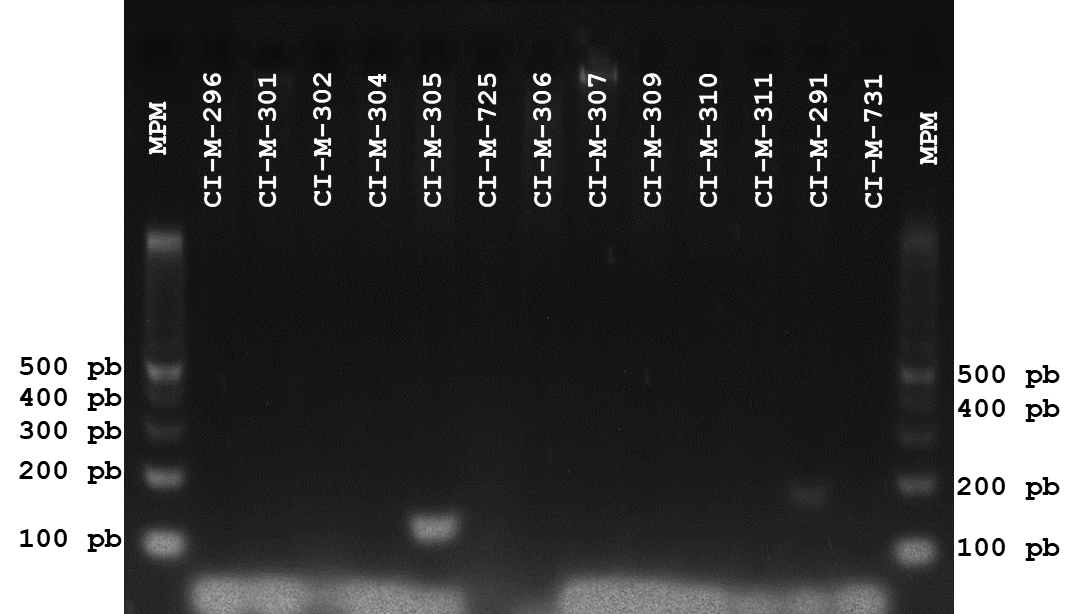


Gel 22. Agarose gel with PCR products obtained using the Miniexon protocol (Fernandes et al., 2001) for the detection of Trypanosoma cruzi in Triatoma dimidiata samples. The expected band (~100 bp) is visible in positive samples. The samples correspond to intestinal contents or feces.


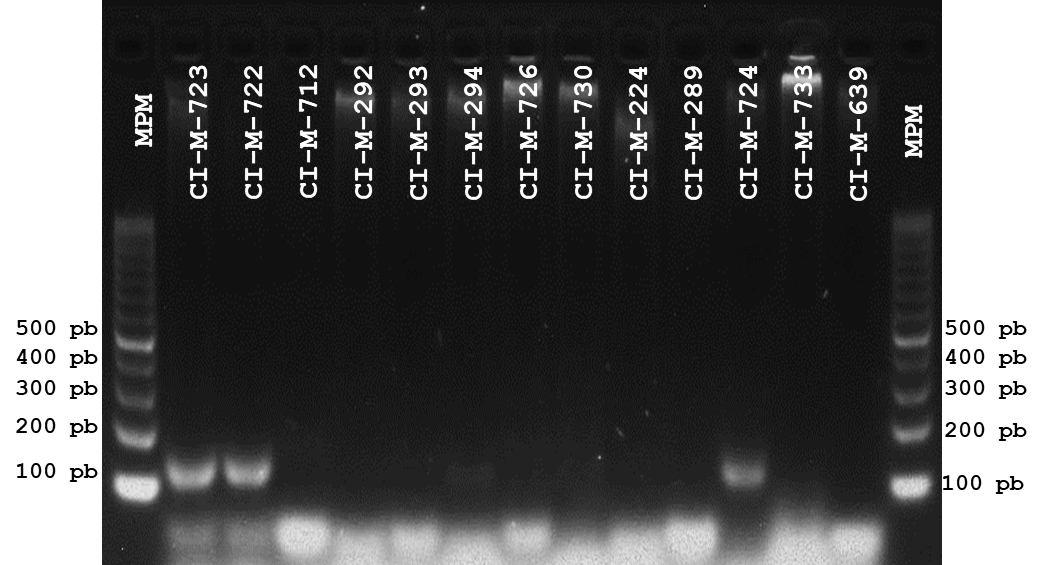


Gel 23. Agarose gel with PCR products obtained using the Miniexon protocol (Fernandes et al., 2001) for the detection of Trypanosoma cruzi in Triatoma dimidiata. The expected band (~100 bp) is visible in positive samples. The samples correspond to intestinal contents or feces.


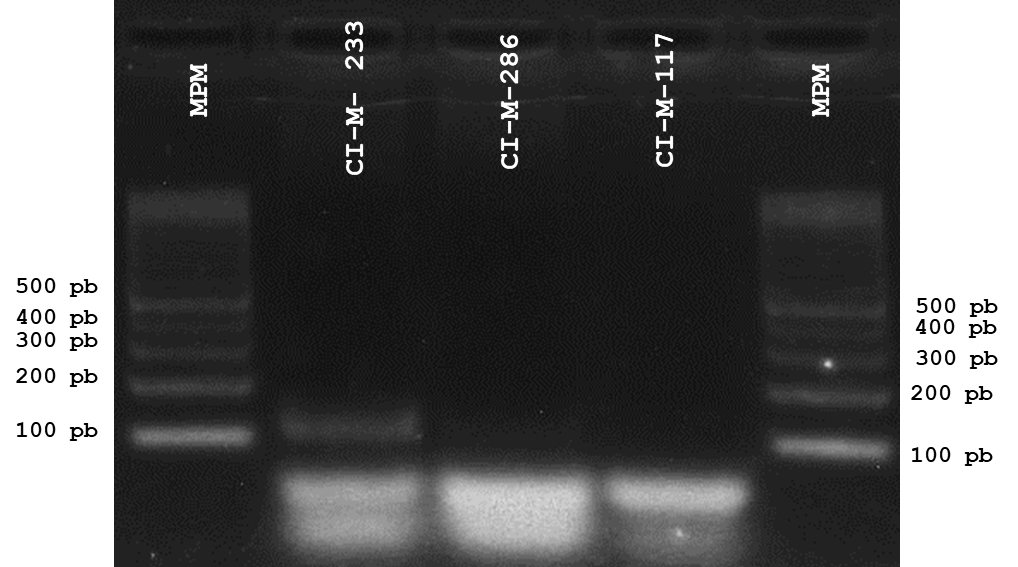


Gel 24. Gel de agarosa con productos de PCR obtenidos de la secuenciación mediante el protocolo de 18S (XXXX., XXXX) para la detección de *Trypanosoma cruzi* en muestras de mamíferos. En el gel de agarosa se observa la banda esperada (~100 bp) en muestras positivas.

| Clave | Especie |
| --- | --- |
| KK019 | Dermanura phaeotis |
| KK032 | Artibeus jamaicensis |
| KK038 | Artibeus jamaicensis |
| KK048 | Artibeus jamaicensis |
| KK055 | Dermanura tolteca |
| KK108 | Mormoops megalophylla |
| KK112 | Pteronotus parnelli |
| KK113 | Pteronotus parnelli |
| KK137 | Sturnira parvidens |
| KK143 | Pteronotus parnelli |
| KK197 | Pteronotus davyi |
| KK205 | Artibeus jamaicensis |
| KK216 | Desmosus rotundus |
| KK222 | Artibeus jamaicensis |
| KK224 | Desmosus rotundus |
| KK228 | Desmosus rotundus |
| KK302 | Artibeus jamaicensis |
| KK317 | Artibeus jamaicensis |
| KK321 | Pteronotus parnelli |
| KK323 | Pteronotus parnelli |
| KK328 | Ototylomys phyllotis |
| KK336 | Pteronotus parnelli |
| KK363 | Artibeus jamaicensis |
| KK368 | Artibeus jamaicensis |
| KK374 | Artibeus jamaicensis |
| KK399 | Pteronotus davyi |
| KK405 | Pteronotus davyi |
| KK412 | Pteronotus parnelli |
| KK425 | Pteronotus parnelli |


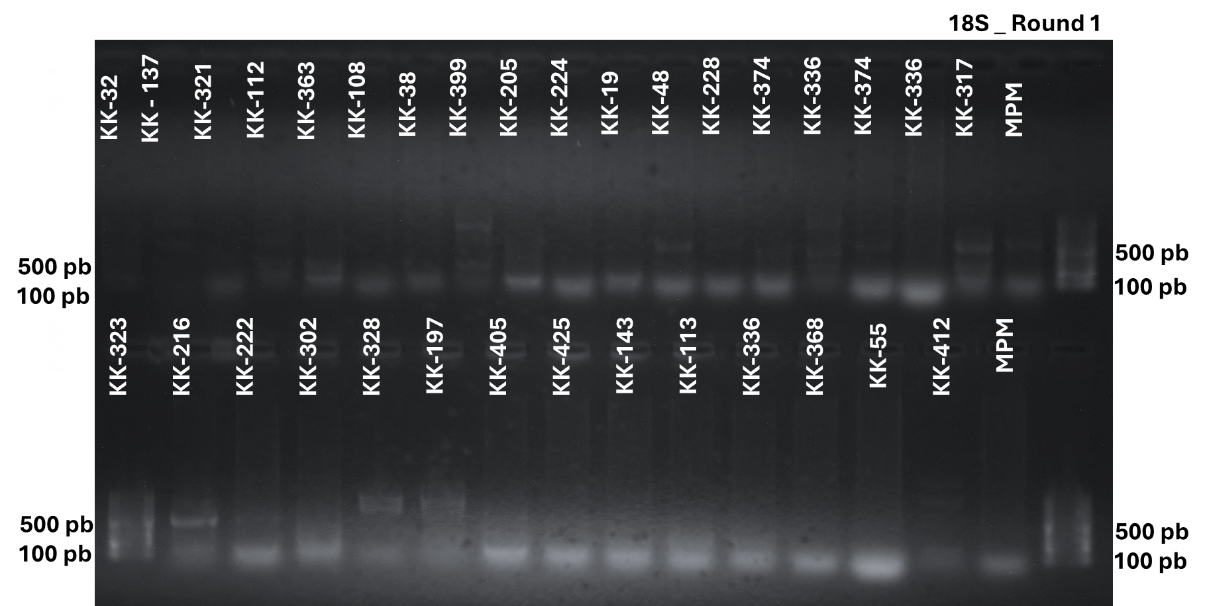


Gel 25. Agarose gel showing PCR products of the small subunit ribosomal RNA gene for the detection of Trypanosoma spp. in bat samples. The expected band (~600 bp) is visible in positive samples.

| Clave | Especie |
| --- | --- |
| KK029 | Artibeus jamaicensis |
| KK034 | Artibeus jamaicensis |
| KK111 | Pteronotus parnelli |
| KK117 | Pteronotus parnelli |
| KK195 | Desmosus rotundus |
| KK277 | Mormoops megalophylla |
| KK310 | Pteronotus parnelli |
| KK311 | Artibeus jamaicensis |
| KK318 | Pteronotus parnelli |
| KK348 | Artibeus jamaicensis |
| KK350 | Artibeus jamaicensis |
| KK365 | Artibeus jamaicensis |
| KK367 | Artibeus jamaicensis |
| KK369 | Artibeus jamaicensis |
| KK396 | Pteronotus parnelli |
| KK400 | Pteronotus davyi |
| KK417 | Pteronotus parnelli |


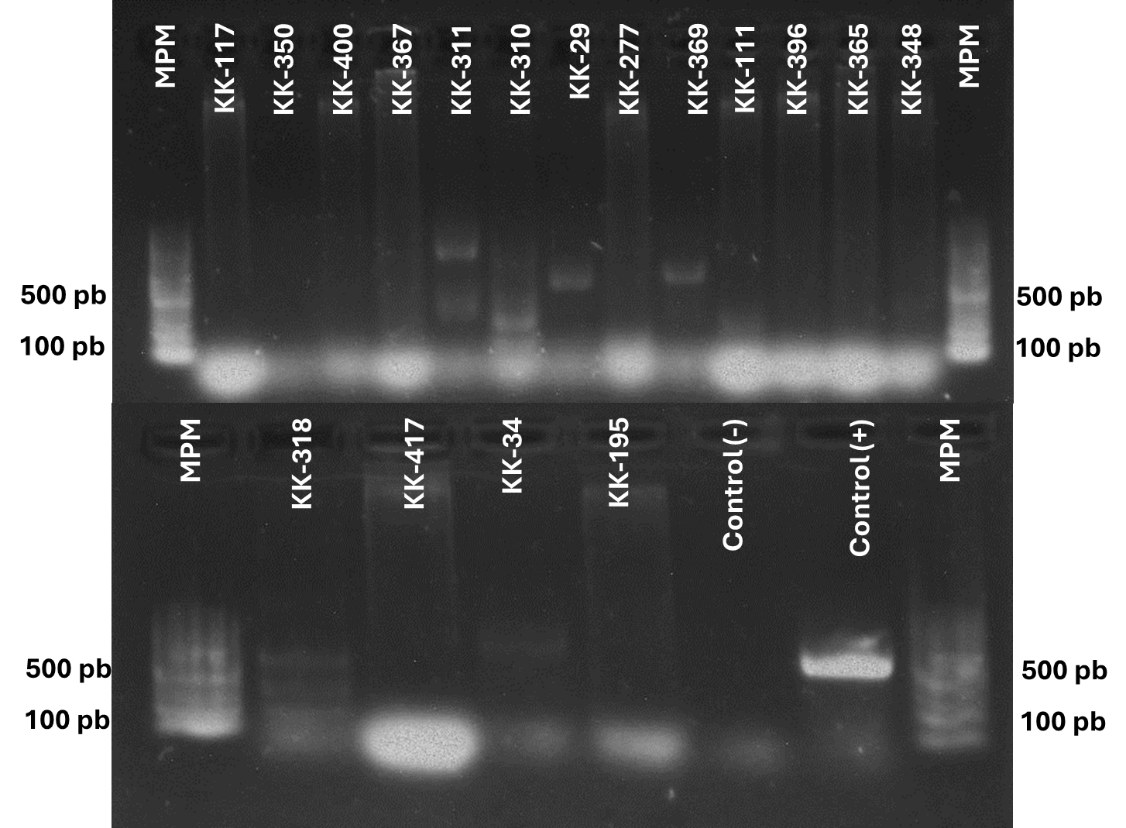


Gel 26. Agarose gel showing PCR products amplified from the small subunit ribosomal RNA gene for the detection of Trypanosoma spp. in mammal and bug samples. The expected band (~600 bp) is visible in positive samples. The first five samples correspond to mammals. The remaining samples correspond to intestinal contents or feces of Triatoma dimidiata.

| Clave | Especie |
| --- | --- |
| KK214 | Molossus rufus |
| KK223 | Desmosus rotundus |
| KK316 | Pteronotus parnelli |
| KK414 | Pteronotus davyi |
| KK416 | Pteronotus parnelli |


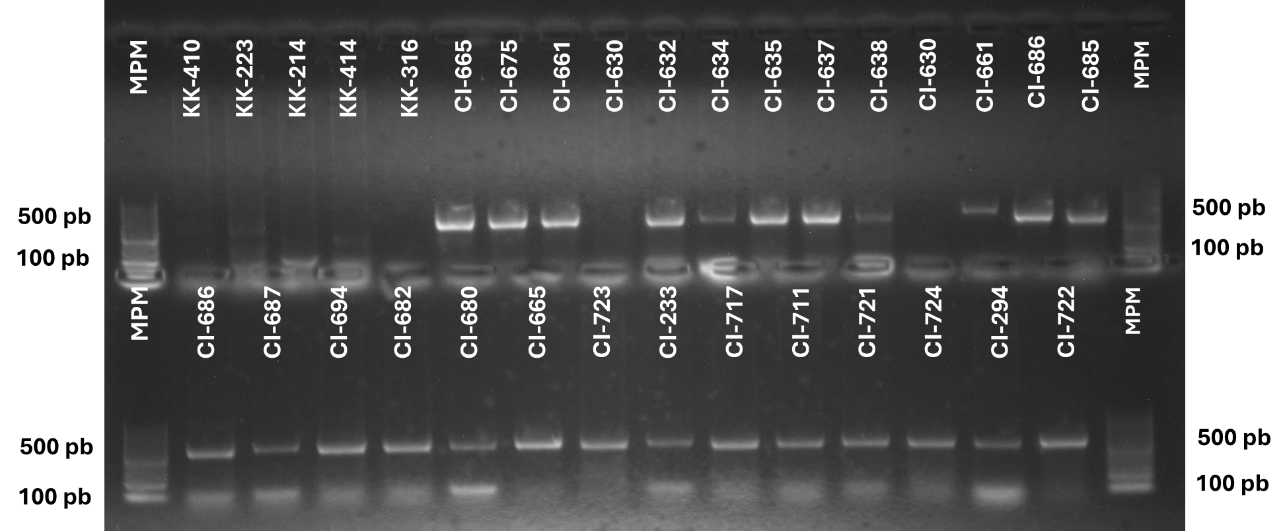


Gel 27. Agarose gel showing PCR products amplified from the small subunit ribosomal RNA gene for the detection of Trypanosoma spp. in mammal and bug samples. The expected band (~600 bp) is visible in positive samples. Samples labeled with “KK” correspond to mammals. The remaining samples correspond to intestinal contents of Triatoma dimidiata, except for those indicated, which were obtained from feces.

| Clave | Especie |
| --- | --- |
| KK159 | Heteromys gaumeri |
| KK160 | Heteromys gaumeri |
| KK185 | Heteromys gaumeri |
| KK189 | Heteromys gaumeri |
| KK191 | Heteromys gaumeri |
| KK247 | Heteromys gaumeri |
| KK284 | Heteromys gaumeri |


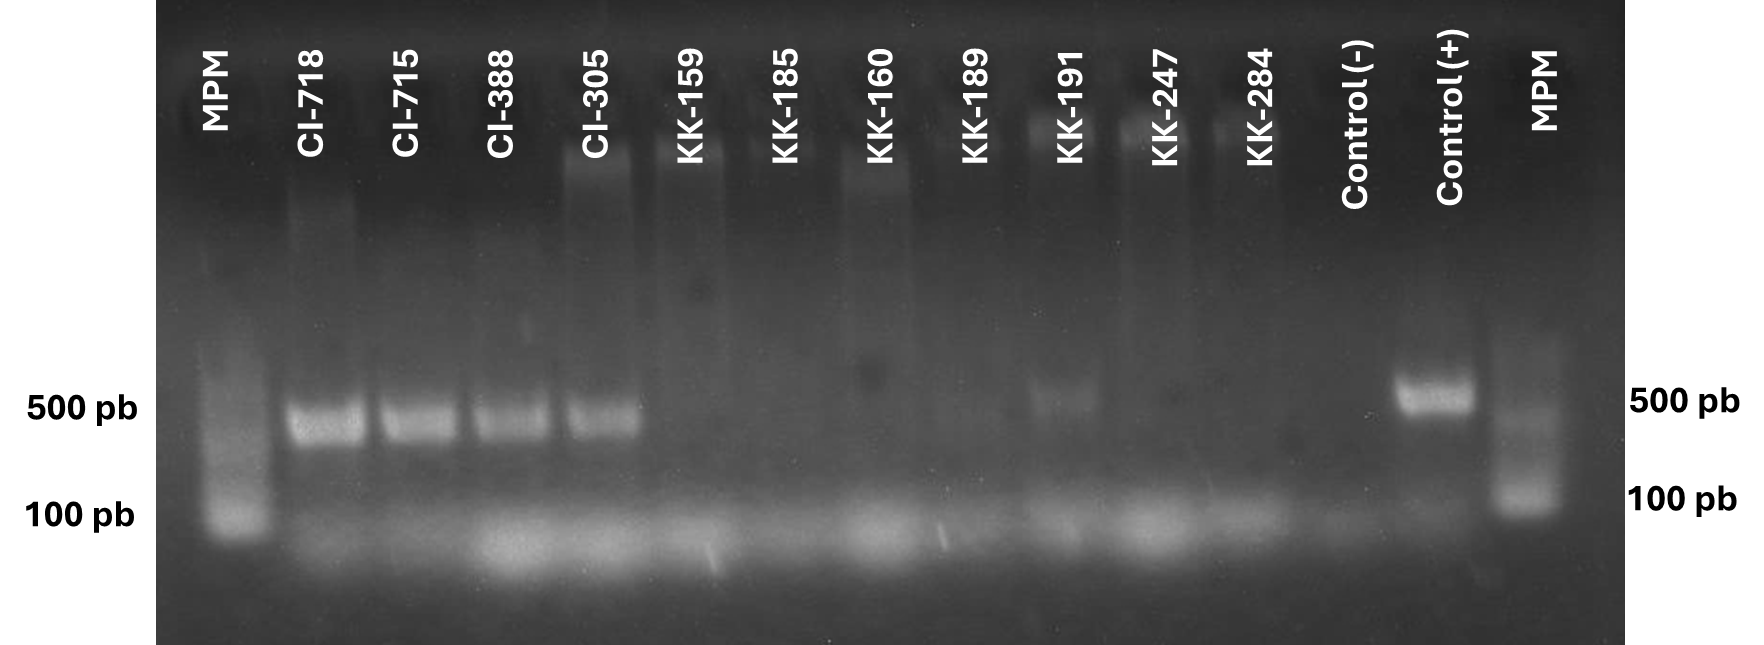


Gel 28. Agarose gel showing PCR products amplified from the small subunit ribosomal RNA gene for the detection of Trypanosoma spp. in bat samples. The expected band (~600 bp) is visible in positive samples.

| Clave | Especie |
| --- | --- |
| KK019 | Dermanura phaeotis |
| KK032 | Artibeus jamaicensis |
| KK038 | Artibeus jamaicensis |
| KK048 | Artibeus jamaicensis |
| KK137 | Sturnira parvidens |
| KK204 | Artibeus jamaicensis |
| KK205 | Artibeus jamaicensis |
| KK228 | Desmosus rotundus |
| KK317 | Artibeus jamaicensis |
| KK323 | Pteronotus parnelli |
| KK336 | Pteronotus parnelli |


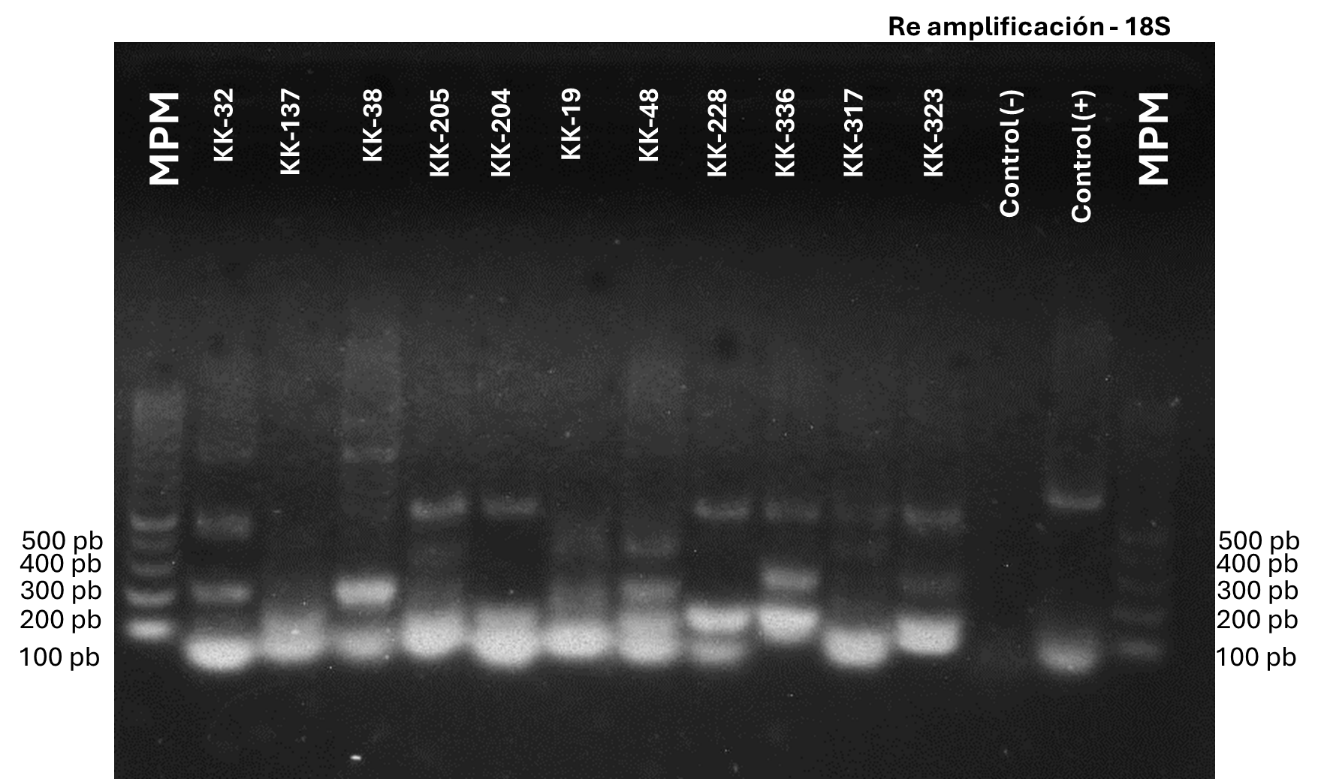


Gel 29. Agarose gel showing PCR products amplified from the small subunit ribosomal RNA gene for the detection of Trypanosoma spp. in mammal and bug samples. The expected band (~600 bp) is visible in positive samples. Samples labeled with "KK" correspond to mammals. The remaining samples correspond to intestinal contents or feces from Triatoma dimidiata.

| Clave | Especie |
| --- | --- |
| KK029 | Artibeus jamaicensis |
| KK034 | Artibeus jamaicensis |
| KK191 | Heteromys gaumeri |
| KK216 | Desmosus rotundus |
| KK224 | Desmosus rotundus |
| KK253 | Heteromys gaumeri |
| KK276 | Pteronotus parnelli |
| KK302 | Artibeus jamaicensis |
| KK311 | Artibeus jamaicensis |
| KK318 | Pteronotus parnelli |
| KK328 | Ototylomys phyllotis |
| KK355 | Molossus rufus |
| KK360 | Artibeus jamaicensis |
| KK369 | Artibeus jamaicensis |
| KK371 | Dermanura phaeotis |
| KK383 | Heteromys gaumeri |


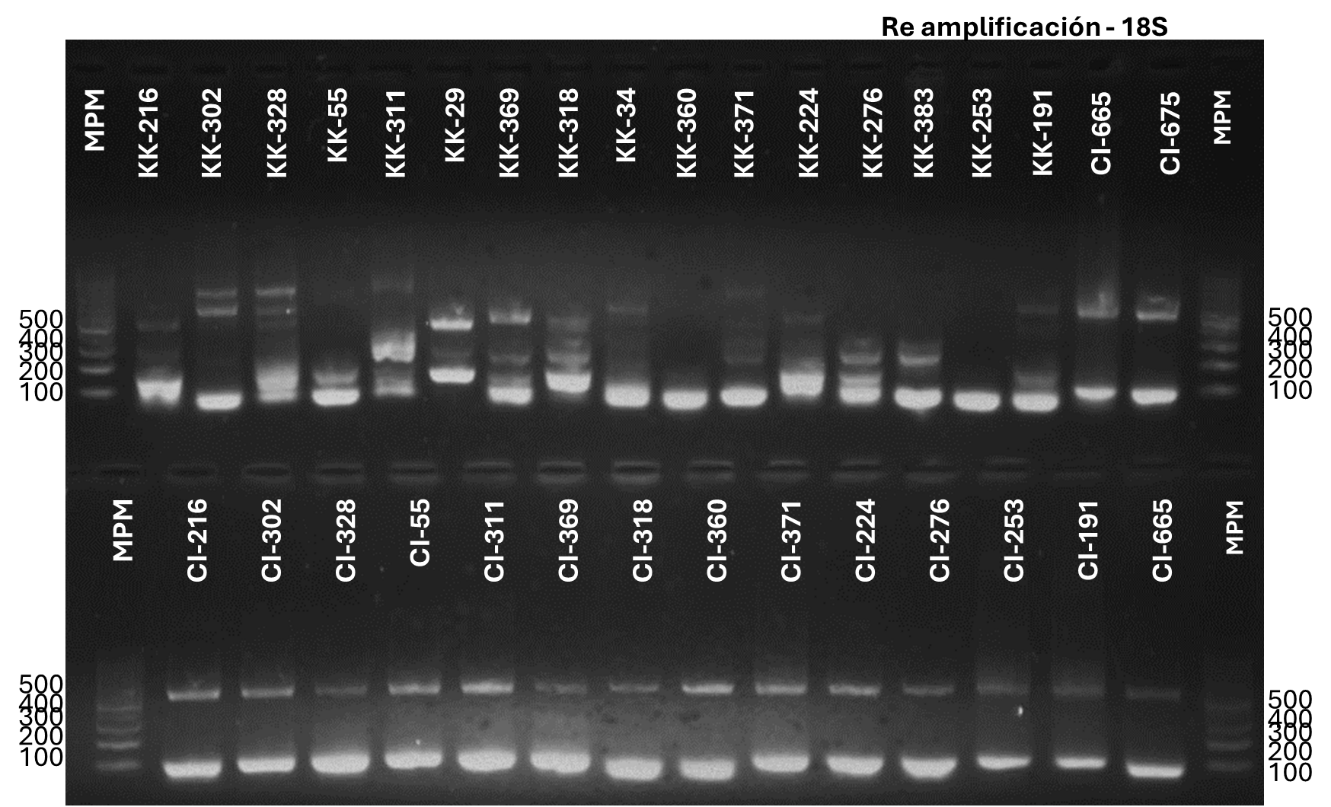


Gel 30. Agarose gel showing PCR products amplified from the small subunit ribosomal RNA gene for the detection of Trypanosoma spp. in bug samples. The expected band (~600 bp) is visible in positive samples.
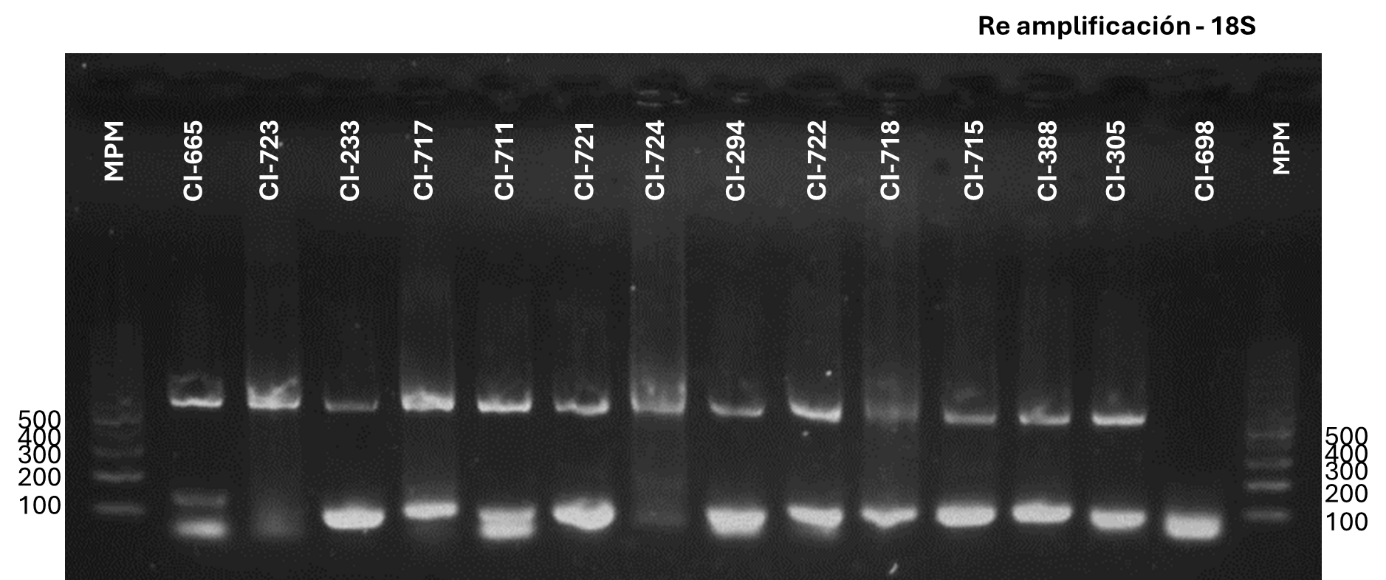


Gel 31. Agarose gel with PCR products amplified using the Miniexon protocol (Fernandes et al., 2001) for the detection of Trypanosoma cruzi in Triatoma dimidiata samples. The gel shows the amplified samples selected for further analysis.


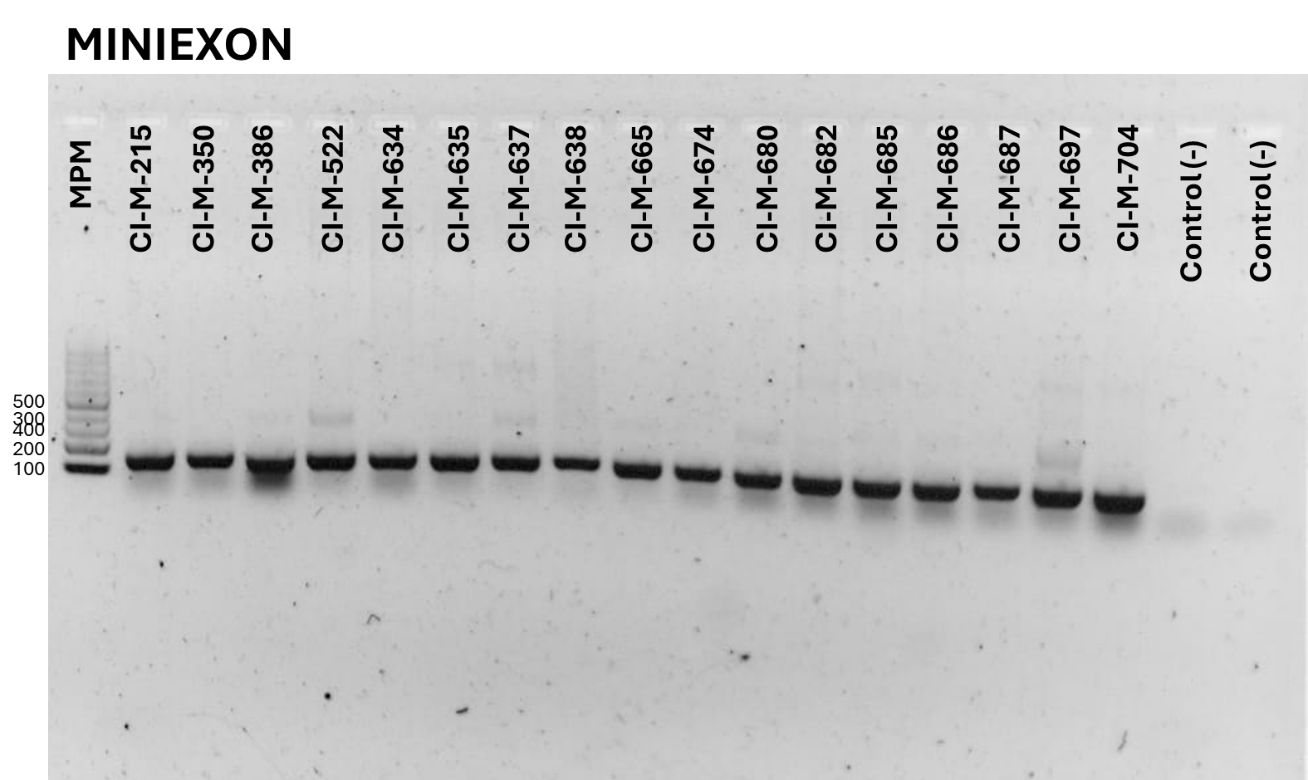


Gel 32. Agarose gel with PCR products amplified using the Miniexon protocol (Fernandes et al., 2001) for the detection of Trypanosoma cruzi in Triatoma dimidiata and mammal samples. The gel shows the amplified samples selected for further analysis.

| Clave | Especie |
| --- | --- |
| KK399 | Pteronotus davyi |
| KK405 | Pteronotus davyi Pteronotus davyi |
| KK410 | Pteronotus davyi |
| KK316 | Pteronotus parnelli |
| KK048 | Artibeus jamaicensis |
| KK340 | Heteromys gaumeri |


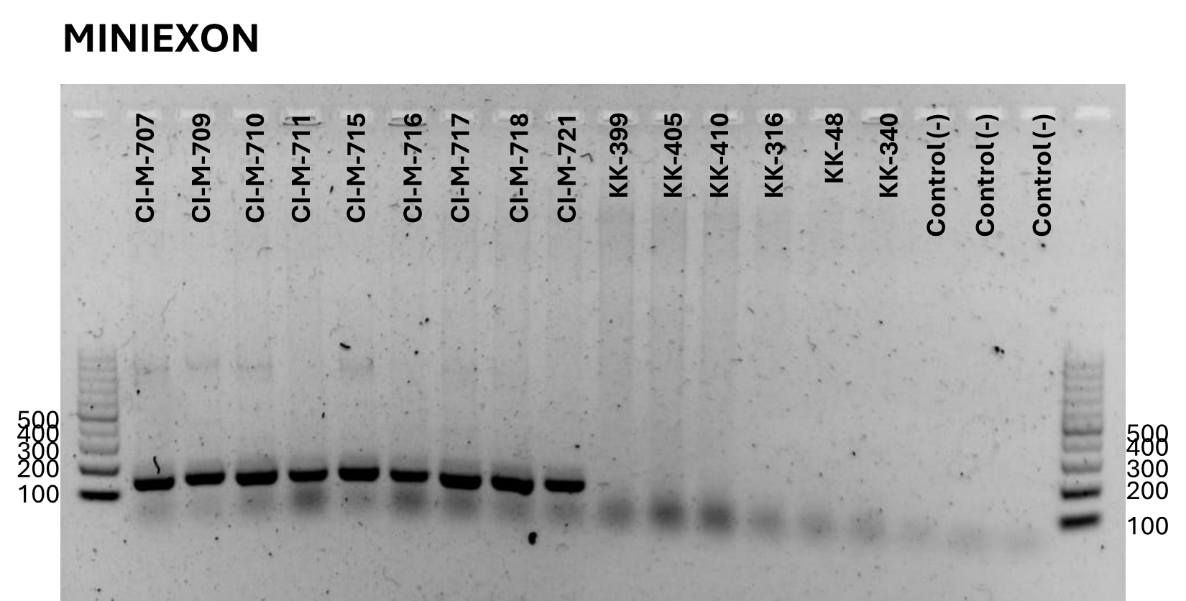


Gel 33. PCR products amplified from the small subunit ribosomal RNA gene for the detection of Trypanosoma spp. in mammals

| Code | Species |
| --- | --- |
| KK025 | Artibeus jamaicensis |
| KK032 | Artibeus jamaicensis |
| KK046 | Artibeus jamaicensis |
| KK126 | Artibeus jamaicensis |
| KK205 | Artibeus jamaicensis |
| KK228 | Desmosus rotundus |
| KK241 | Artibeus jamaicensis |
| KK271 | Artibeus jamaicensis |
| KK274 | Artibeus jamaicensis |
| KK279 | Artibeus jamaicensis |
| KK309 | Pteronotus parnelli |
| KK311 | Artibeus jamaicensis |
| KK323 | Pteronotus parnelli |
| KK336 | Pteronotus parnelli |
| KK349 | Pteronotus parnelli |


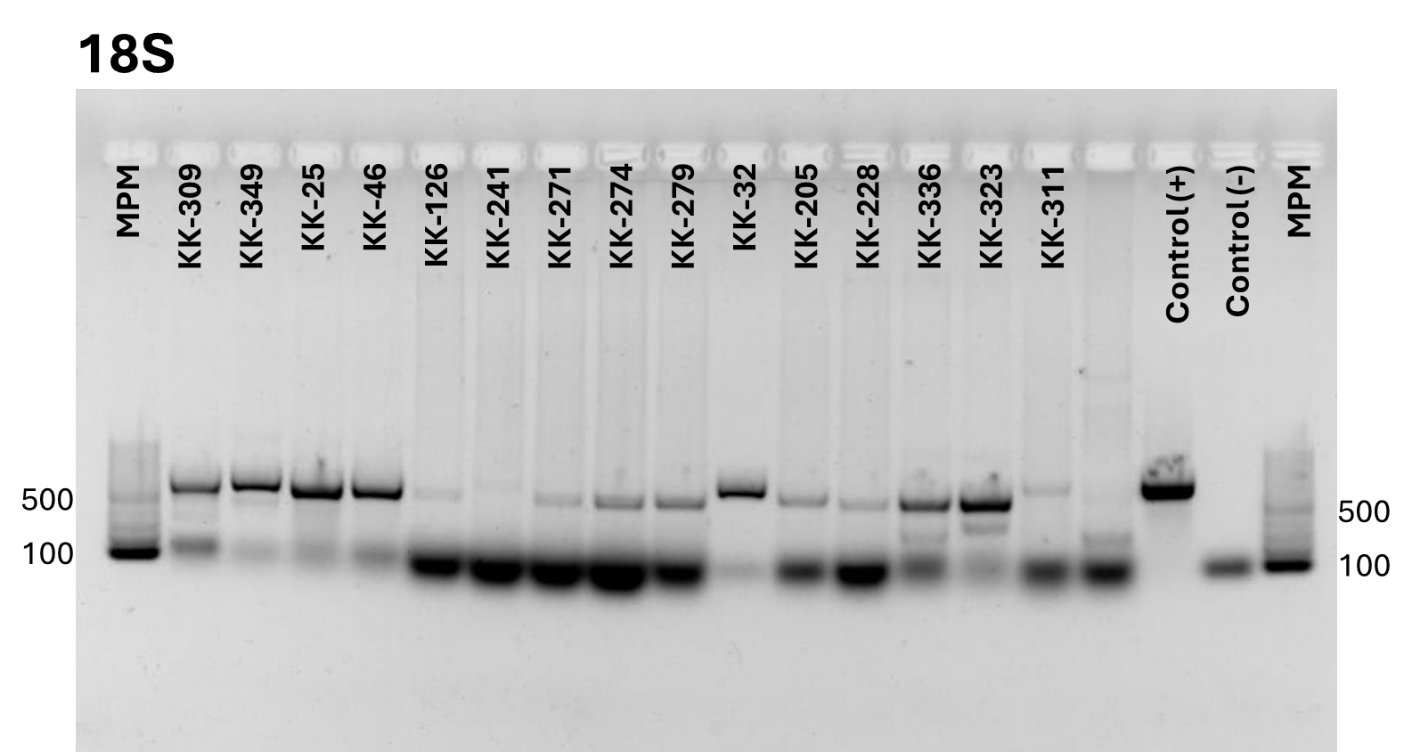

Supplement: Supplementary file 1 [file c8357536fd9a3ff6583e14fc.docx]
